# Supplementary material for: Layer reconstruction, collapse and metallization of van der Waals bonded ZrS2 under high pressure
Source: Research Square preprint supplement (doi:10.21203/rs.3.rs-3590821/v1), 2023-11-17
Supplement: Supplementary file 1 [file 61fbcbecf43e87f94a1d98b7.docx]

**Supplemental Material for “Layer reconstruction, collapse and metallization of** **van der Waals bonded ZrS2 under high pressure”**

Linfei Yang,1,2 Junwei Li,1 Dongzhou Zhang,3 Yuegao Liu,4 and Qingyang Hu1,*

1*Center for High Pressure Science and Technology Advanced Research, Beijing 100094, China* 2*School of Material Science and Engineering, Jingdezhen Ceramic university, Jingdezhen 333001, Jiangxi, China*

3*Hawai’i Institute of Geophysics and Planetology, School of Ocean and Earth Science and Technology, University of Hawai’i at Manoa, Honolulu, HI 96822, USA*

4*CAS Key Laboratory for Experimental Study under Deep-sea Extreme Conditions, Institute of Deep-sea Science and Engineering, Chinese Academy of Sciences, Sanya 572000, China*

* Corresponding author.

*Email addresses*: [qingyang.hu@hpstar.ac.cn](mailto:qingyang.hu@hpstar.ac.cn)

**Supplementary Figures**


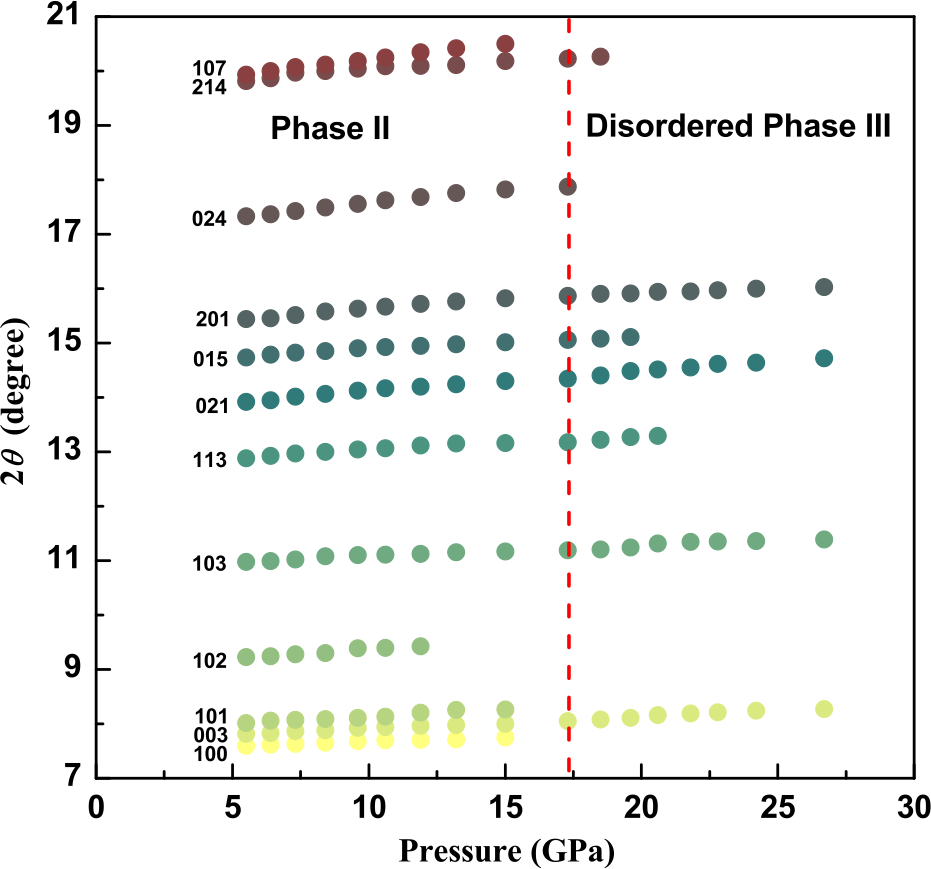


**FIG. S1:** The pressure dependence of the collected 2*θ* angles of diffraction peaks. Most diffraction peaks disappeared in the disordered phase III.


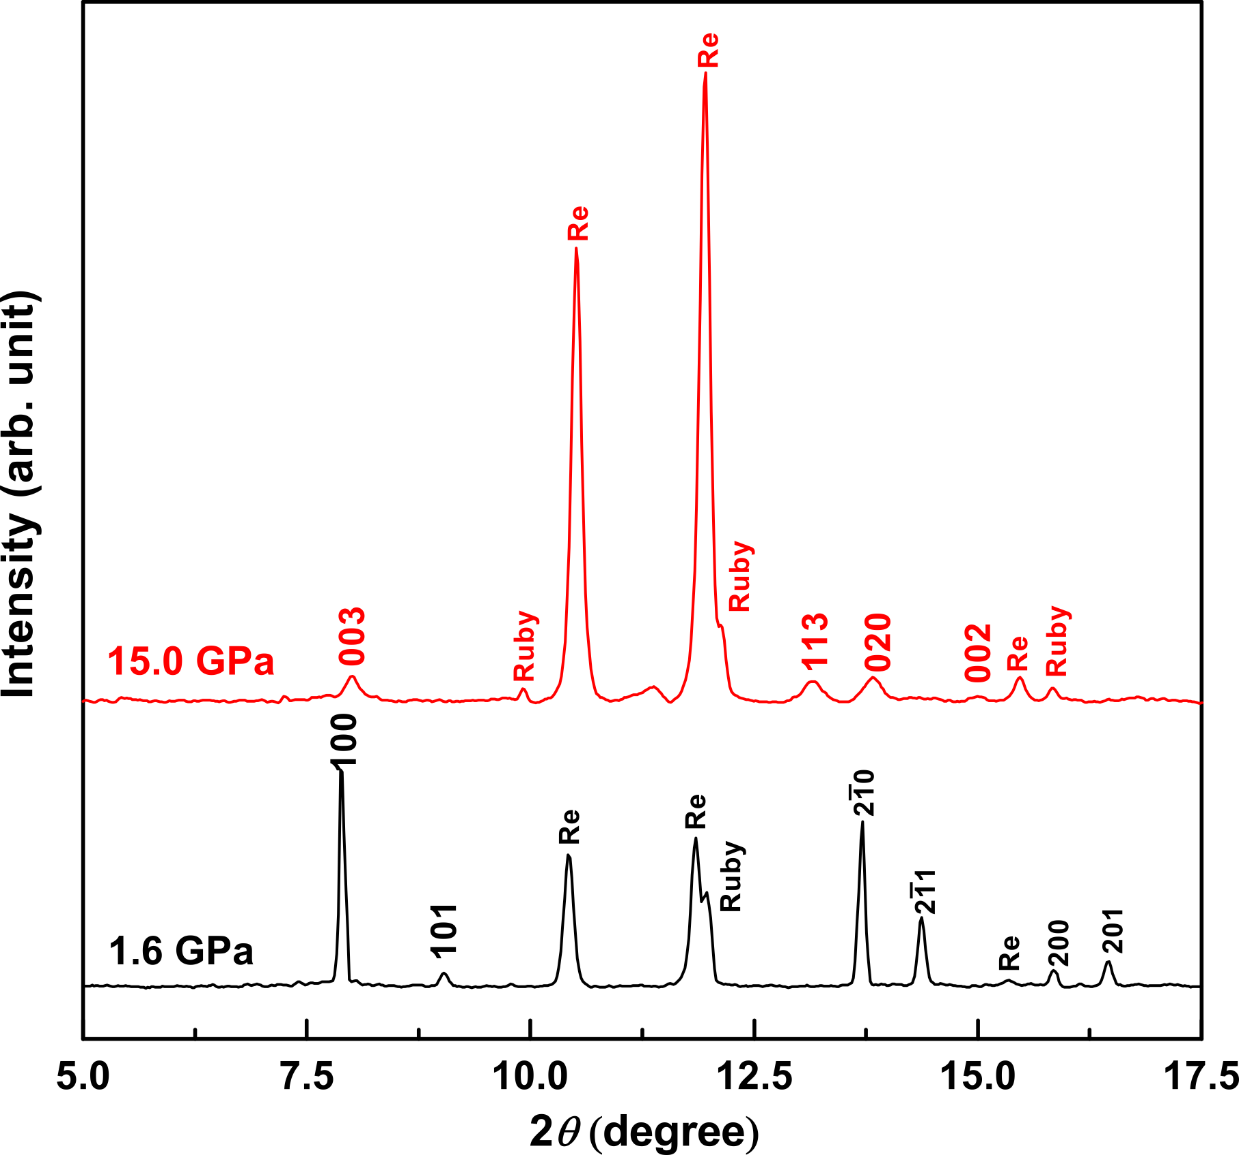


**FIG. S2:** Full spectra at collected at 1.6 GPa and 15.0 GPa. The Miller indices (hkl) are drawn in diagram for *Pm*1 and *Pmm*2 phases.

**Supplementary Table S1**

**TABLE S1:** The frequencies of phonon modes in different phases of ZrS2 and their corresponding pressure derivatives. The error bars are less than the length of symbols.

| Phase | *ω*0 (cm-1) | *dω/dP* (cm-1/GPa) |
| --- | --- | --- |
| Phase I  trigonal: *Pm*1 | 140.5 | 3.49 |
| 191.0 | 2.75 |
| 248.8 | 3.16 |
| 312.7 | 7.14 |
| 332.7 | 6.20 |
| Phase II  Orthorhombic: *Pmm*2 | 112.6 | -0.22 |
| 134.4 | 1.14 |
| 181.0 | 1.19 |
| 263.1 | 1.26 |
| 285.6 | 2.26 |
| 348.4 | 4.86 |
| 364.5 | 3.87 |
| Phase III | 141.1 | 0.02 |
| 157.8 | -0.16 |
| 164.3 | 0.90 |
| 192.2 | 1.06 |
| 248.6 | 0.61 |
| 318.3 | 1.82 |
| 378.1 | 1.89 |
| 408.3 | 3.41 |
| 456.2 | 2.59 |
